# Supplementary material
Source: PubMed Central journal article supplement (PMC3804414)
Supplement: NIHMS497822-supplement-Supporting_Information.pdf [file NIHMS497822-supplement-Supporting_Information.pdf]

## Representative Examples of RE Measurements

We show a representative collection of relaxation data for the four sample pairs 68K1-109[Dy(DOTA)]/68K1-109[Lu(DOTA)], 68K1-109[Dy(DTPA)]/68K1-109[Lu(DOTA)], 131K1-109[Dy(DOTA)]/131K1-109[Lu(DOTA)] and 131K1-109[Dy(DTPA)]/131K1-109[Lu(DOTA)] for temperatures  $T=\{40\text{K}, 60\text{K}, 80\text{K}, 100\text{K}\}$ . The concentrations of the samples have been estimated with CW EPR measurements during the sample preparation process. All samples were prepared as a mixture of 25  $\mu\text{L}$  glycerol and 25  $\mu\text{L}$  of protein solution in buffer, and had therefore a total sample volume of 50  $\mu\text{L}$ .

Table S1: Sample types and concentrations of nitroxide-labeled (C[NO]) and doubly nitroxide- and Dy<sup>III</sup>-labeled (C[NO-Dy<sup>III</sup>]) T4 lysozyme molecules:

| Sample              | C[NO]             | C[NO-Dy <sup>III</sup> ] | Figure  |
|---------------------|-------------------|--------------------------|---------|
| 68K1-109[Lu(DOTA)]  | 120 $\mu\text{M}$ | -                        |         |
| 68K1-109[Lu(DTPA)]  | 75 $\mu\text{M}$  | -                        |         |
| 68K1-109[Dy(DOTA)]  | 130 $\mu\text{M}$ | 34 $\mu\text{M}$         | Fig. S1 |
| 68K1-109[Dy(DTPA)]  | 75 $\mu\text{M}$  | 14 $\mu\text{M}$         | Fig. S2 |
| 131K1-109[Dy(DOTA)] | 75 $\mu\text{M}$  | 26 $\mu\text{M}$         | Fig. S3 |
| 131K1-109[Dy(DTPA)] | 75 $\mu\text{M}$  | 25 $\mu\text{M}$         | Fig. S4 |

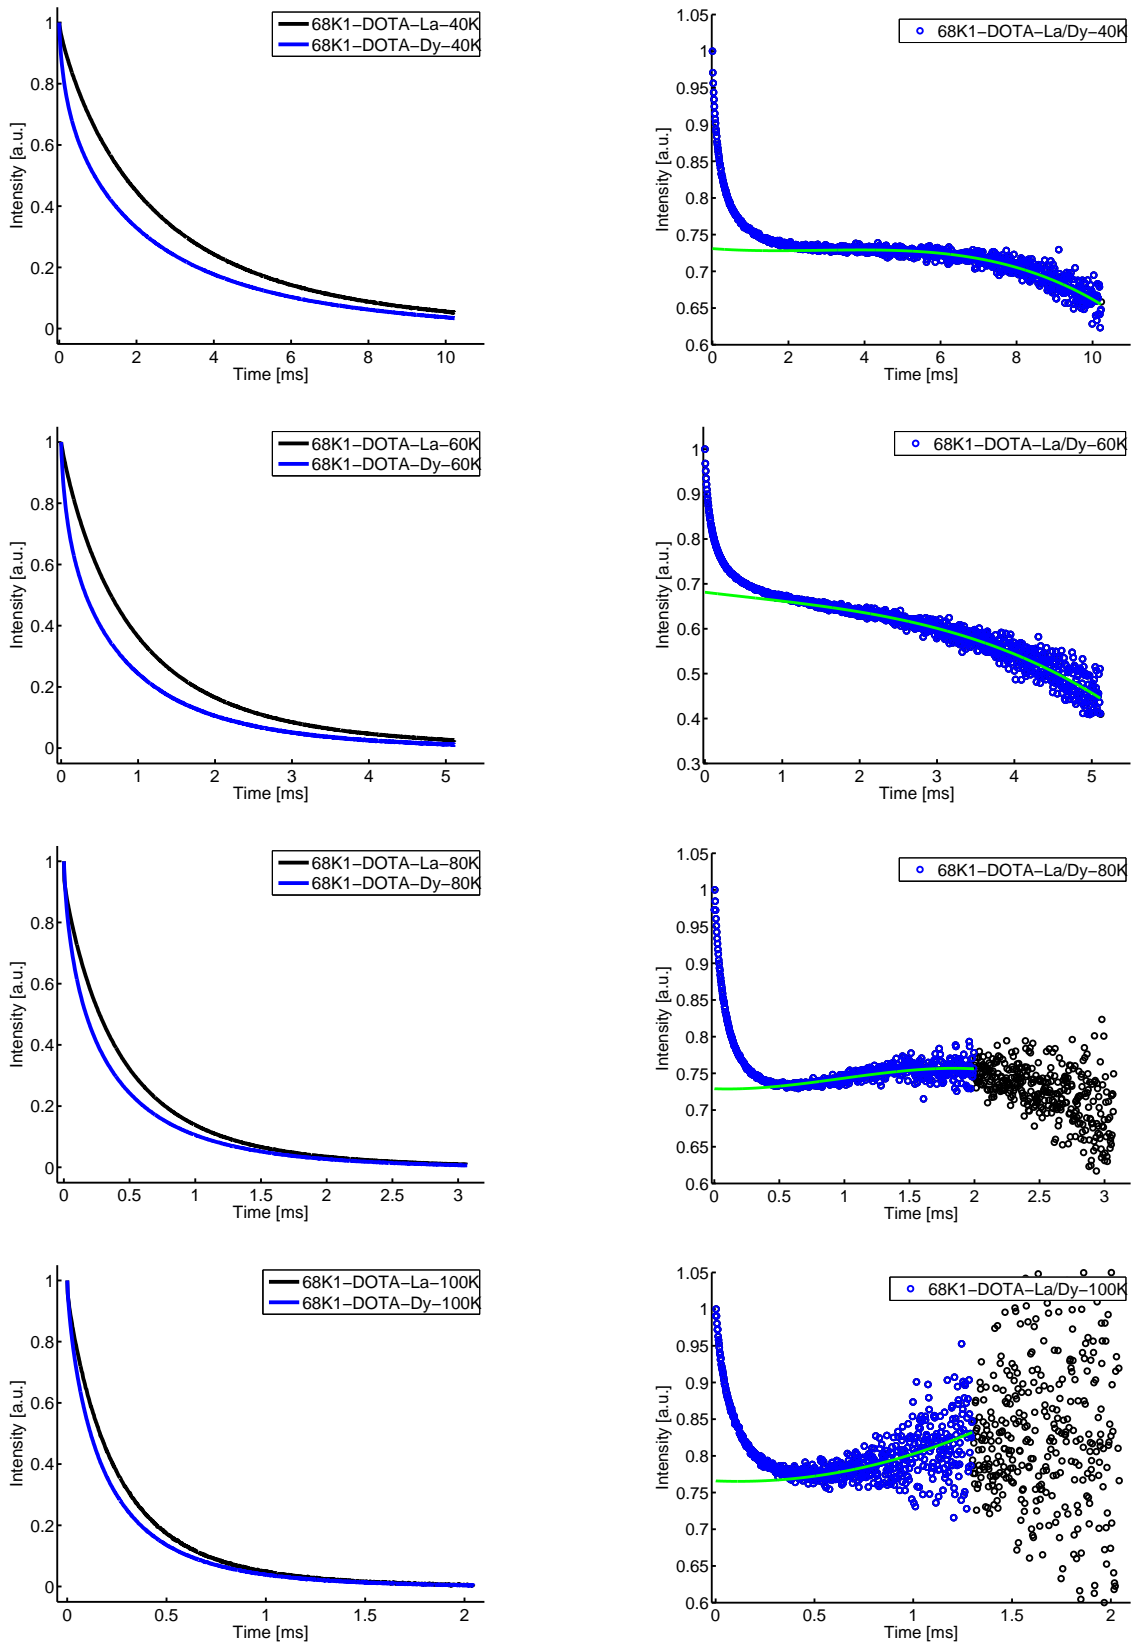

Figure S1: Relaxation data for sample 68K1-109[Dy(DOTA)] for temperatures  $T=\{40\text{K}, 60\text{K}, 80\text{K}, 100\text{K}\}$ . Left column of figures: Renormalized inversion recovery traces (Dy - blue, Lu - black). Right column of figures: Division of inversion recovery traces Dy/Lu and background fits (green). RE data points cutted out before background fitting are shown in black.

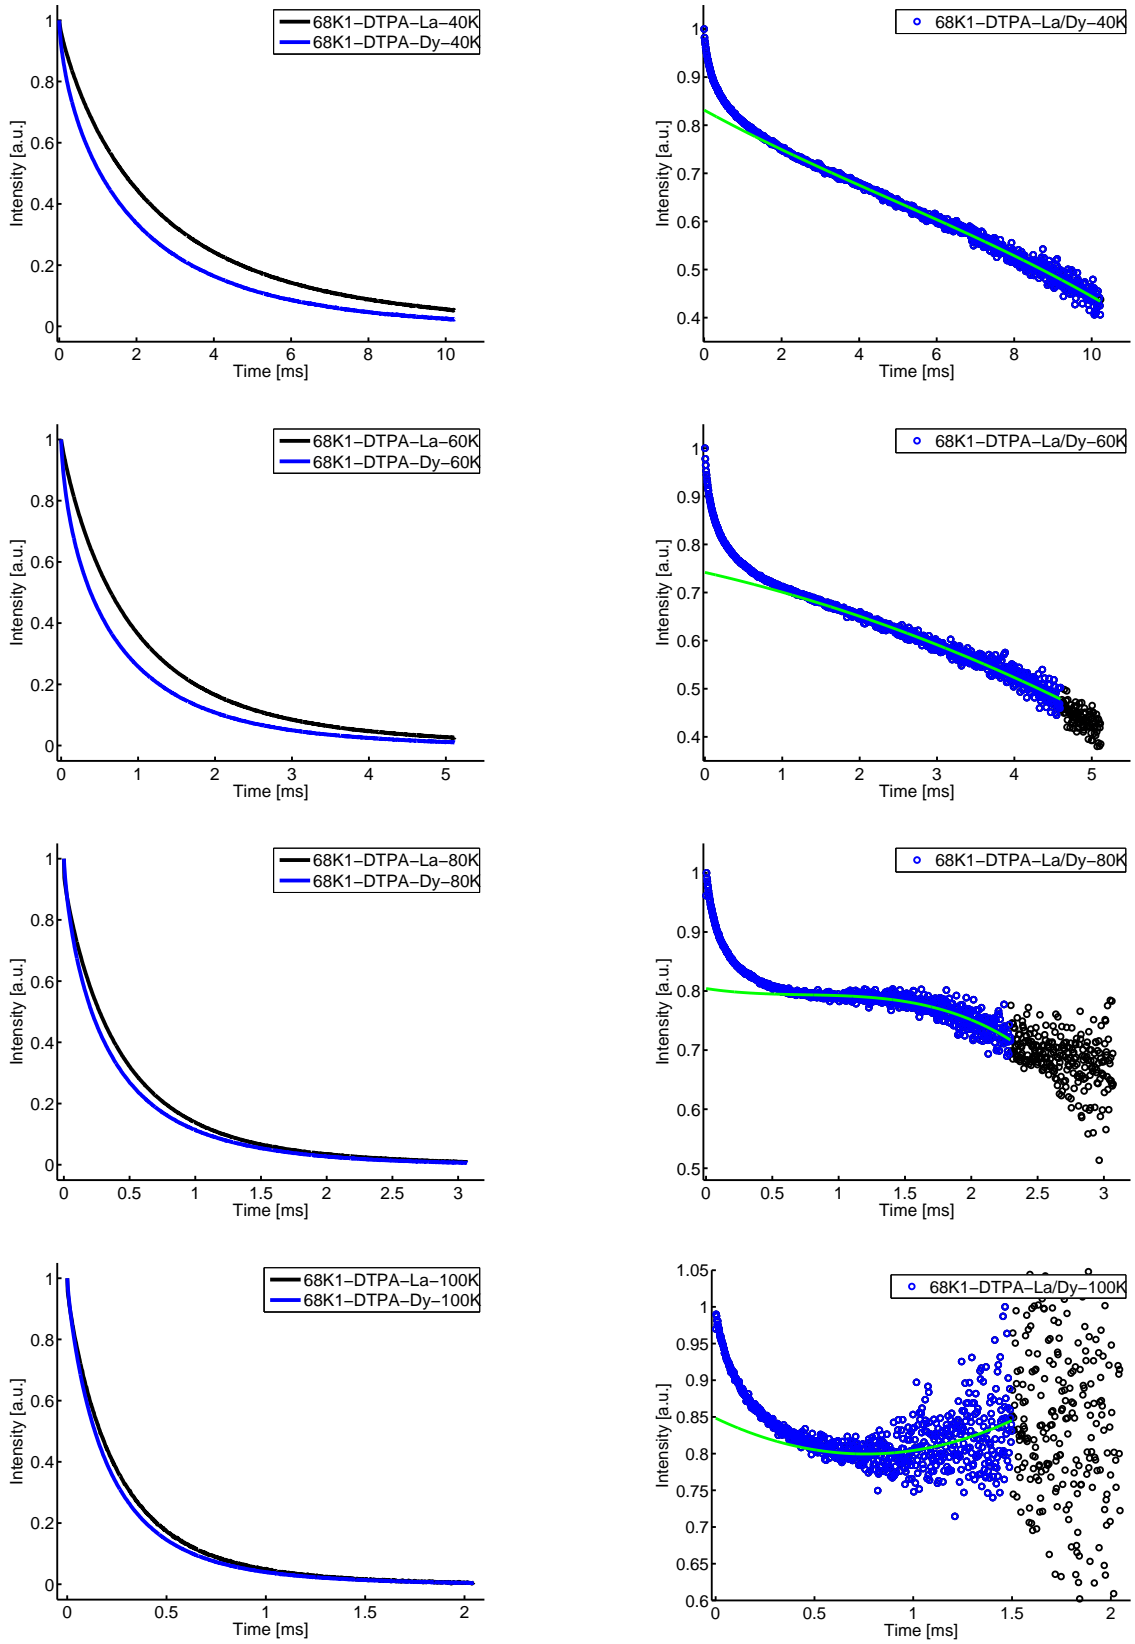

Figure S2: Relaxation data for sample 68K1-109[Dy(DTPA)] for temperatures  $T=\{40\text{K}, 60\text{K}, 80\text{K}, 100\text{K}\}$ . Left column of figures: Renormalized inversion recovery traces (Dy - blue, Lu - black). Right column of figures: Division of inversion recovery traces Dy/Lu and background fits (green). RE data points cutted out before background fitting are shown in black.

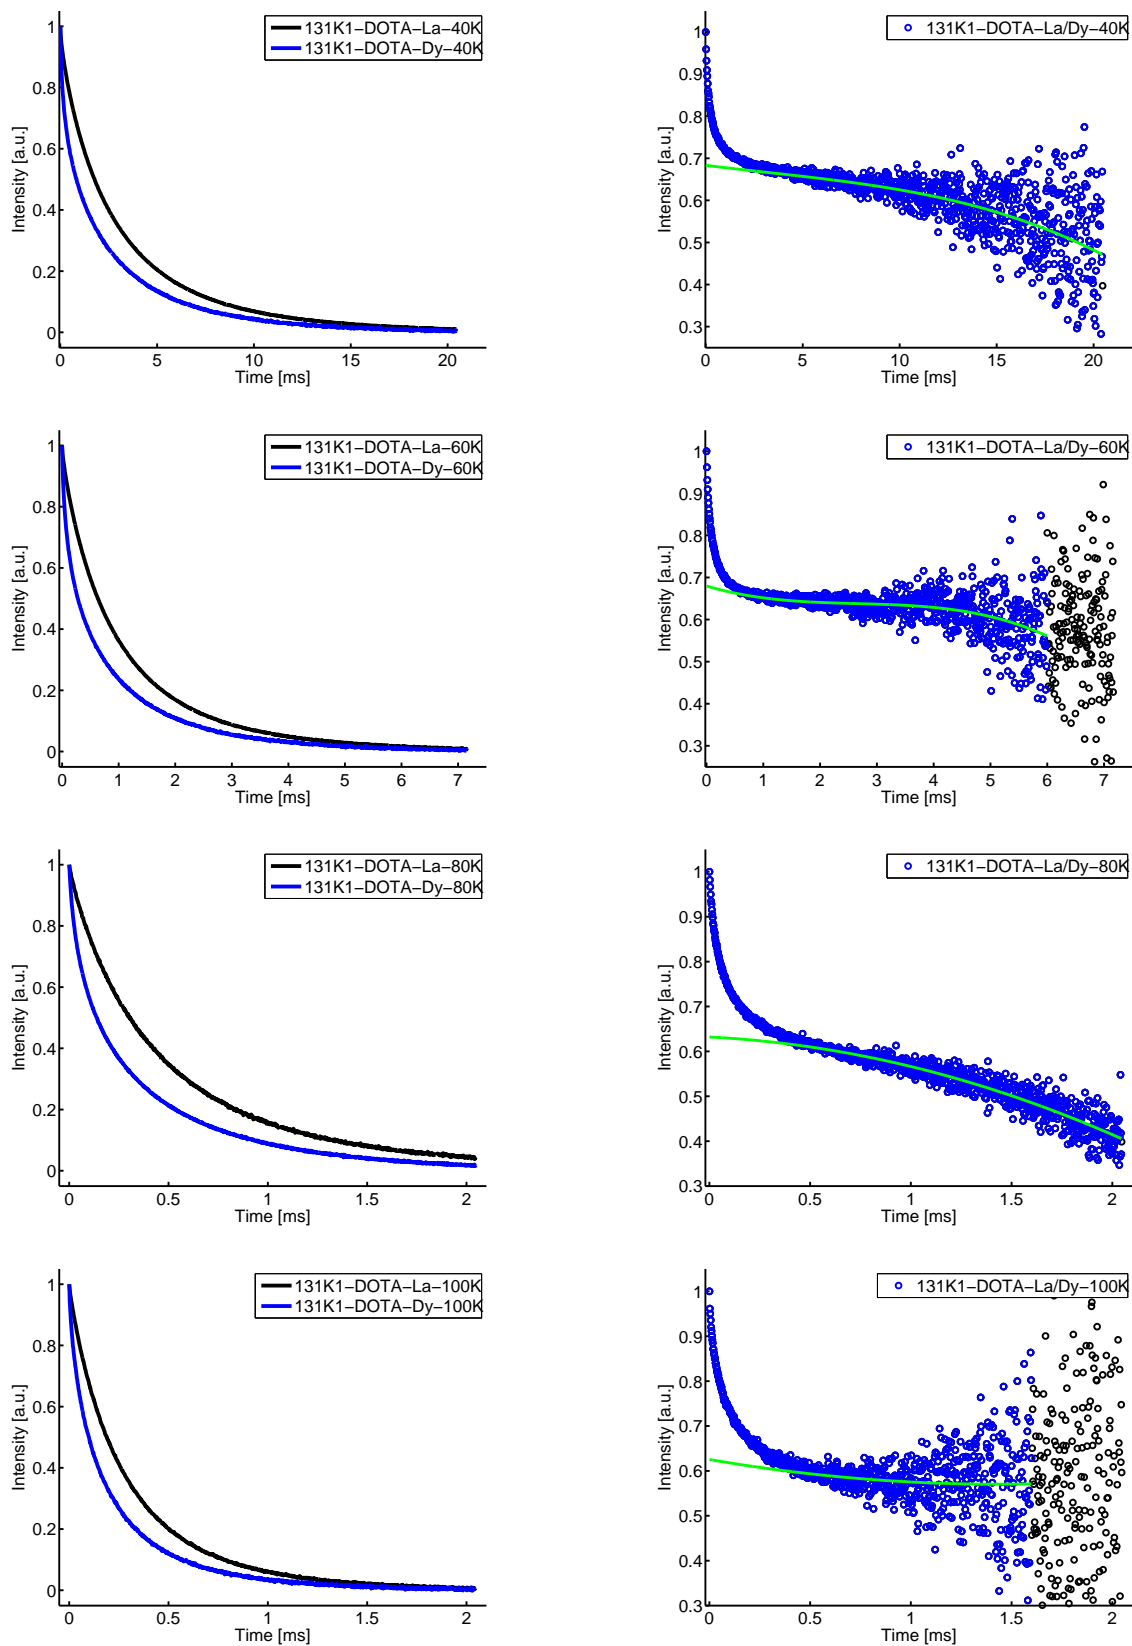

Figure S3: Relaxation data for sample 131K1-109[Dy(DOTA)] for temperatures  $T=\{40\text{K}, 60\text{K}, 80\text{K}, 100\text{K}\}$ . Left column of figures: Renormalized inversion recovery traces (Dy - blue, Lu - black). Right column of figures: Division of inversion recovery traces Dy/Lu and background fits (green). RE data points cutted out before background fitting are shown in black.

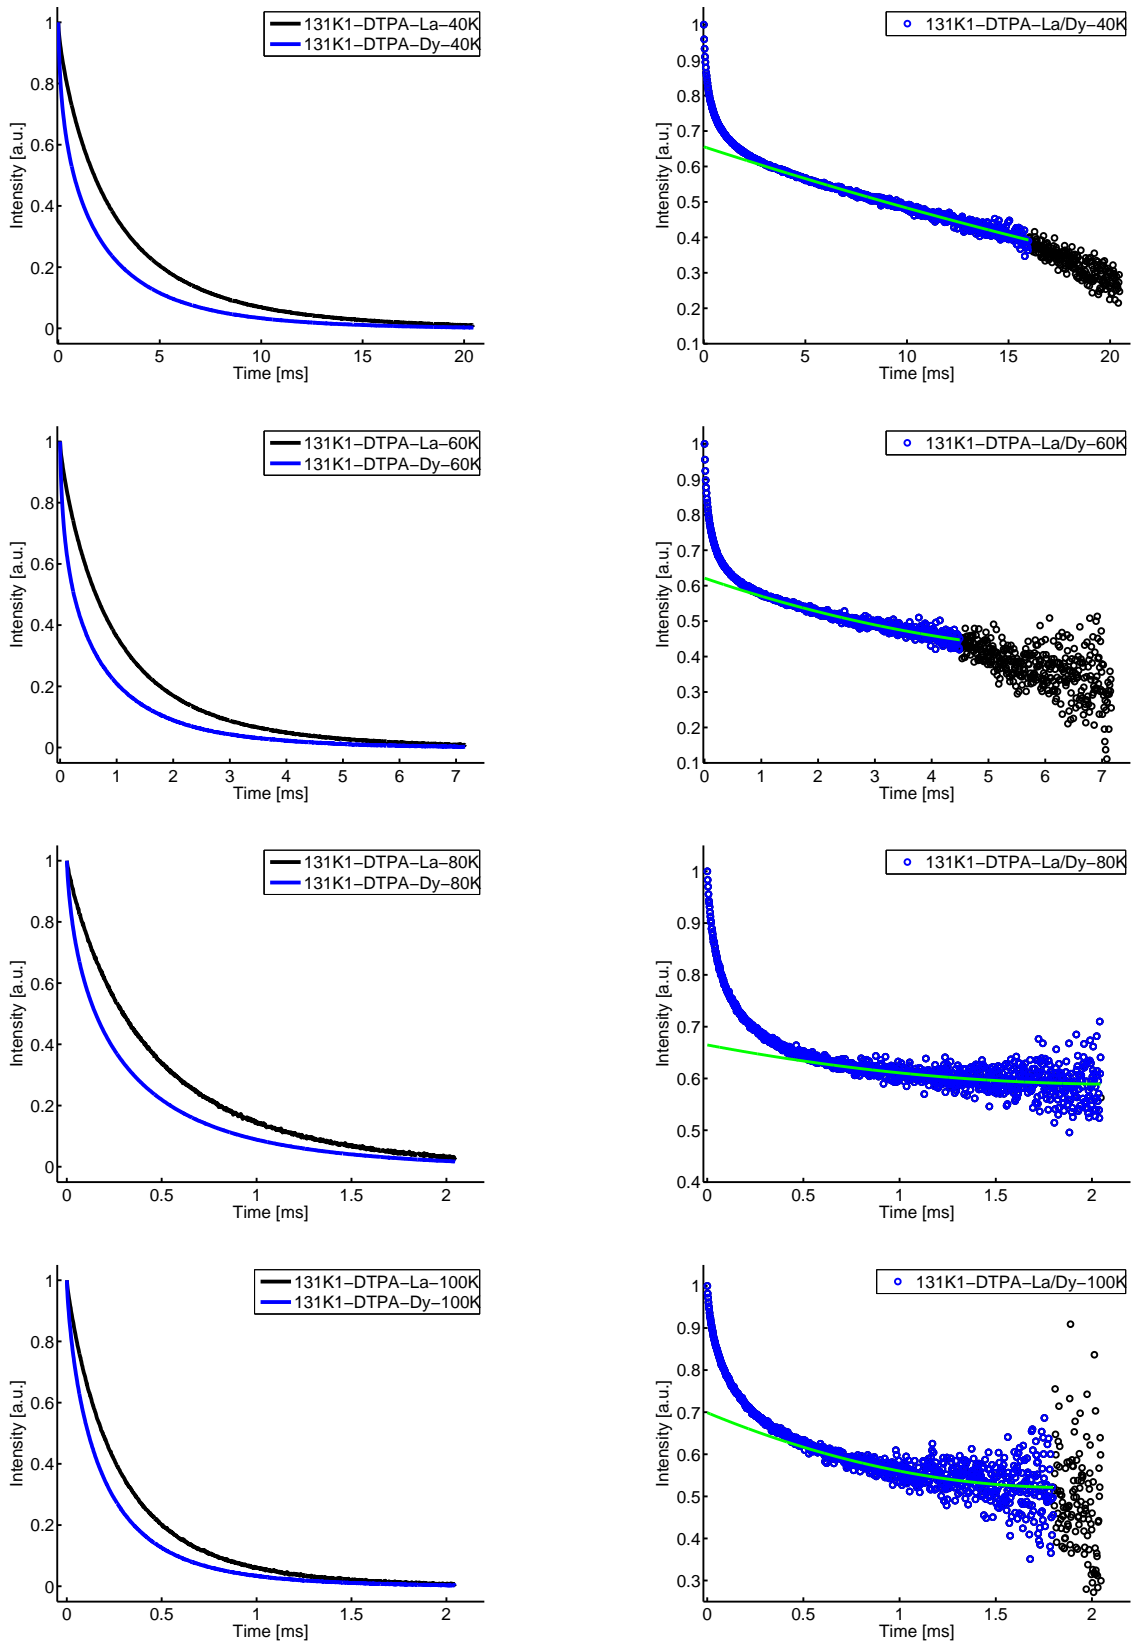

Figure S4: Relaxation data for sample 131K1-109[Dy(DTPA)] for temperatures  $T=\{40\text{K}, 60\text{K}, 80\text{K}, 100\text{K}\}$ . Left column of figures: Renormalized inversion recovery traces (Dy - blue, Lu - black). Right column of figures: Division of inversion recovery traces Dy/Lu and background fits (green). RE data points cutted out before background fitting are shown in black.
